# Supplementary material for: Correlation of rattlers with thermal transport and thermoelectric performance
Source: Royal Society of Chemistry journal article supplement (doi:10.1039/d3cp02194g), 2023-01-01
Supplement: d3cp02194g1.pdf [file d3cp02194g1.pdf]

## Supplementary Material: Correlation of Rattlers with Thermal Transport and Thermoelectric Performance

Aixian She,<sup>1</sup> Yinchang Zhao,<sup>1,\*</sup> Jun Ni,<sup>2</sup> Sheng Meng,<sup>3,4</sup> and Zhenhong Dai<sup>1,†</sup>

<sup>1</sup>*Department of Physics, Yantai University,  
Yantai 264005, People's Republic of China*

<sup>2</sup>*Department of Physics, Tsinghua University,  
Beijing 100084, People's Republic of China*

<sup>3</sup>*Beijing National Laboratory for Condensed Matter Physics and Institute of Physics,  
Chinese Academy of Sciences, Beijing, 100190, People's Republic of China*

<sup>4</sup>*Collaborative Innovation Center of Quantum Matter,  
Beijing 100084, People's Republic of China*

(Dated: July 26, 2023)

PACS numbers: 65.40.-b, 66.70.-f, 63.20.-e, 72.20.-i

Keywords: first-principles calculation, anharmonic lattice dynamics, thermal transport, half-Heusler compound, electronic transport, host-guest structures.

---

\* y.zhao@ytu.edu.cn

† zh dai@ytu.edu.cn

## Structure and stability.

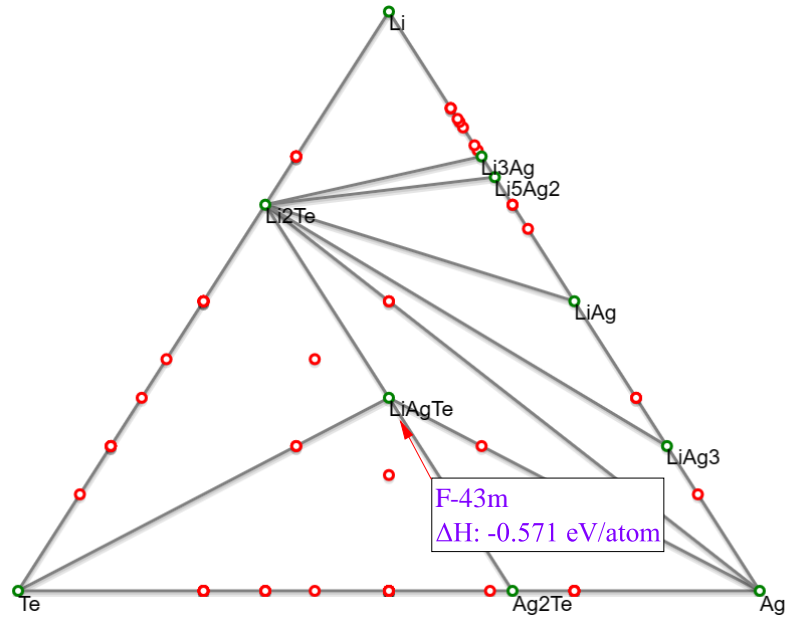

**Fig. S1.** (Color online). The green circles on the phase diagram of LiAgTe represent the minimum free energy structures of different compositions in the ternary system.

## Rattlers and Thermal Transport.

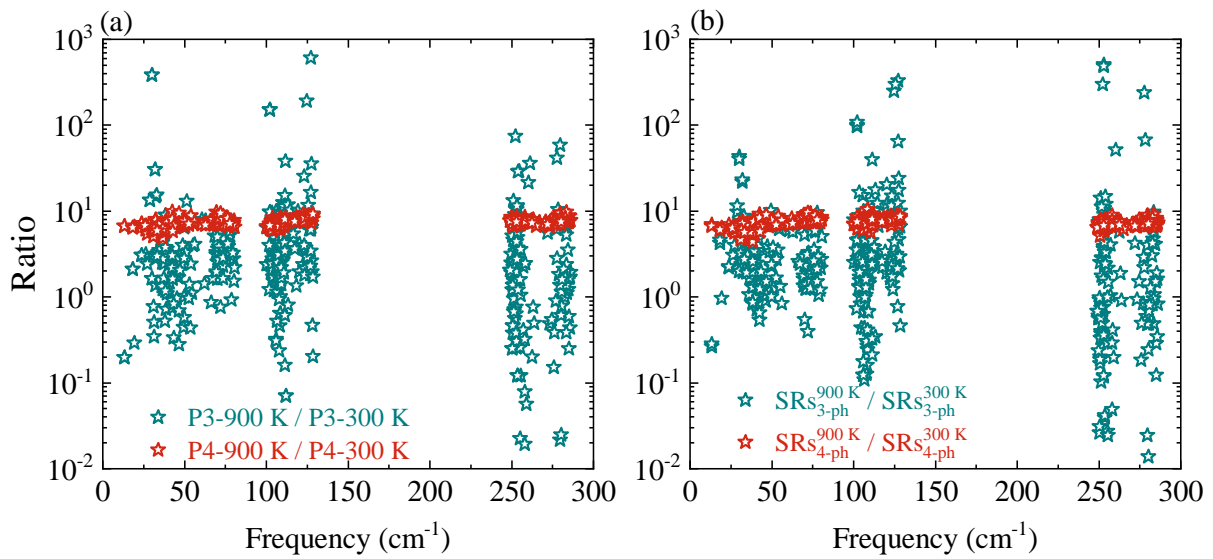

**Fig. S2.** (Color online). The ratio of the scattering phase space (P3, P4) (a) and scattering index (SRs) (b) of 900 K to 300 K is given.

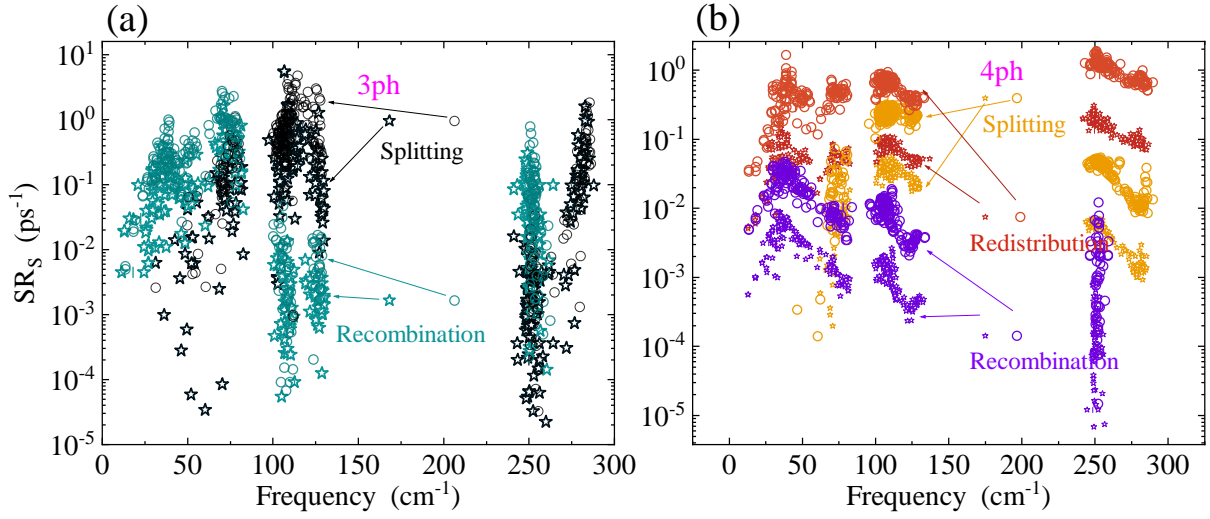

**Fig. S3.** (Color online). (a). The process of Splitting and Recombination of 3-ph scattering. (b) The process of Splitting, Redistribution and Recombination of 4-ph scattering. The circle scatter and star scatter in (a), (b) correspond to 900K and 300K, respectively.

### Rattlers and electronic transport.

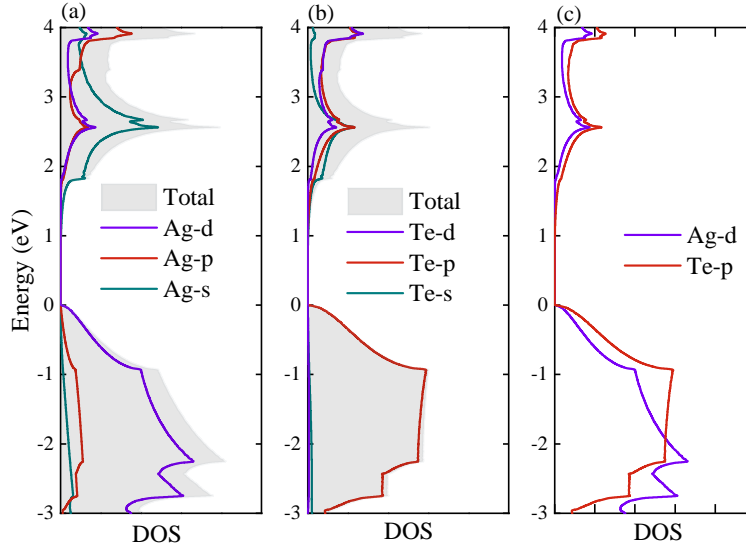

**Fig. S4.** (Color online). Comparison of the density of states of different orbital electrons of Ag atom (a) and Te atom (b) calculated using pbe functional, as well as the contribution of d-orbital of Ag atom and p-orbital of Te atom (c).

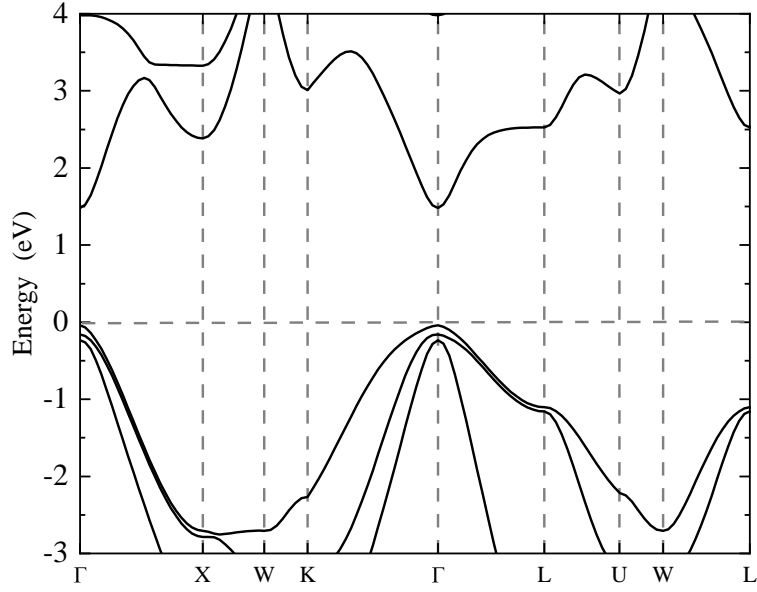

**Fig. S5.** (Color online). Band structure captured using HSE06.

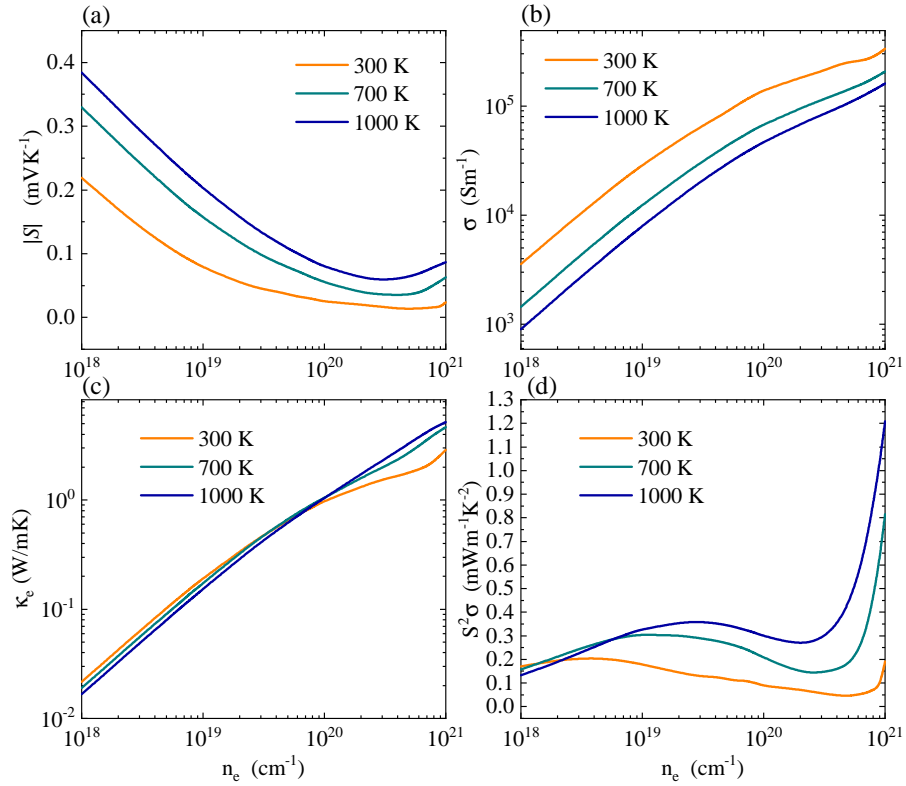

**Fig. S6.** (Color online). Electronic transport parameters under n-type doping.
